# Supplementary material for: Treatment outcome of nimotuzumab plus chemotherapy in advanced cancer patients: a single institute experience
Source: PubMed Central journal article supplement (PMC5078104; doi:10.18632/oncotarget.8516), 2016-03-31
Supplement: oncotarget-07-33391-s001.pdf [file oncotarget-07-33391-s001.pdf]

## **Treatment outcome of nimotuzumab plus chemotherapy in advanced cancer patients: a single institute experience**

### **SUPPLEMENTARY TABLE**

**Supplementary Table S1: Supplementary: System Organ classification and Grade of all adverse events in different tumor localizations.**

**See Supplementary File 1**
